# Supplementary material
Source: publisher site journal article supplement (https://www.dovepress.com/article/320965)
Supplement: Supplementary file 1 [file get_supplementary_file.php]

## Supplementary materials

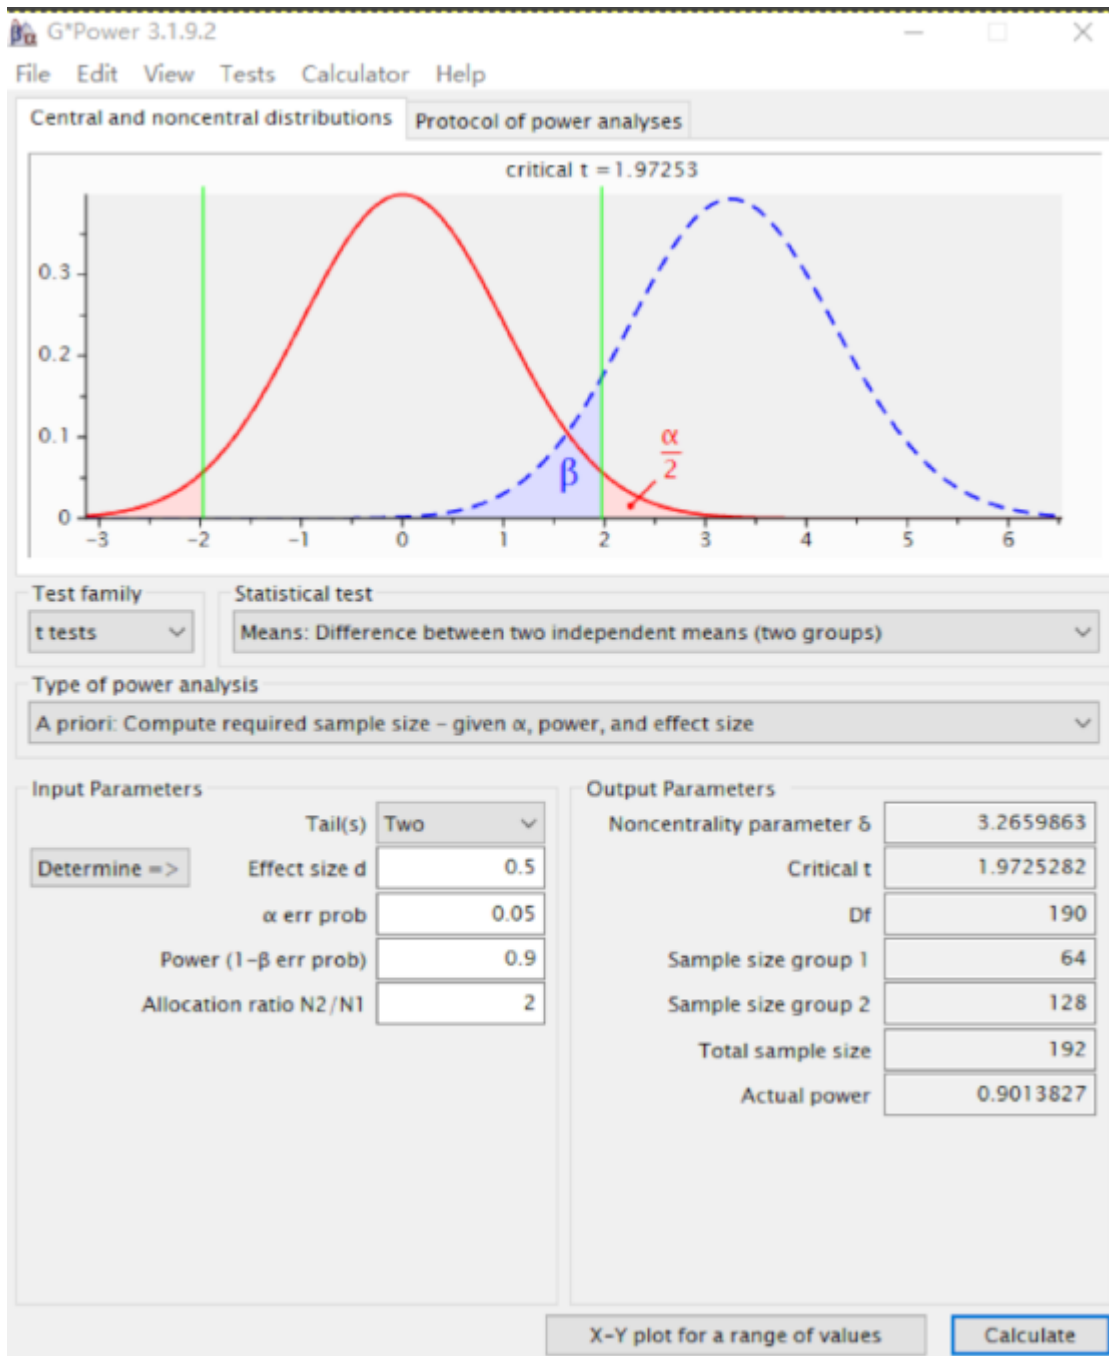

**Supplementary Figure 1** Gpower was used to calculate the sample size.

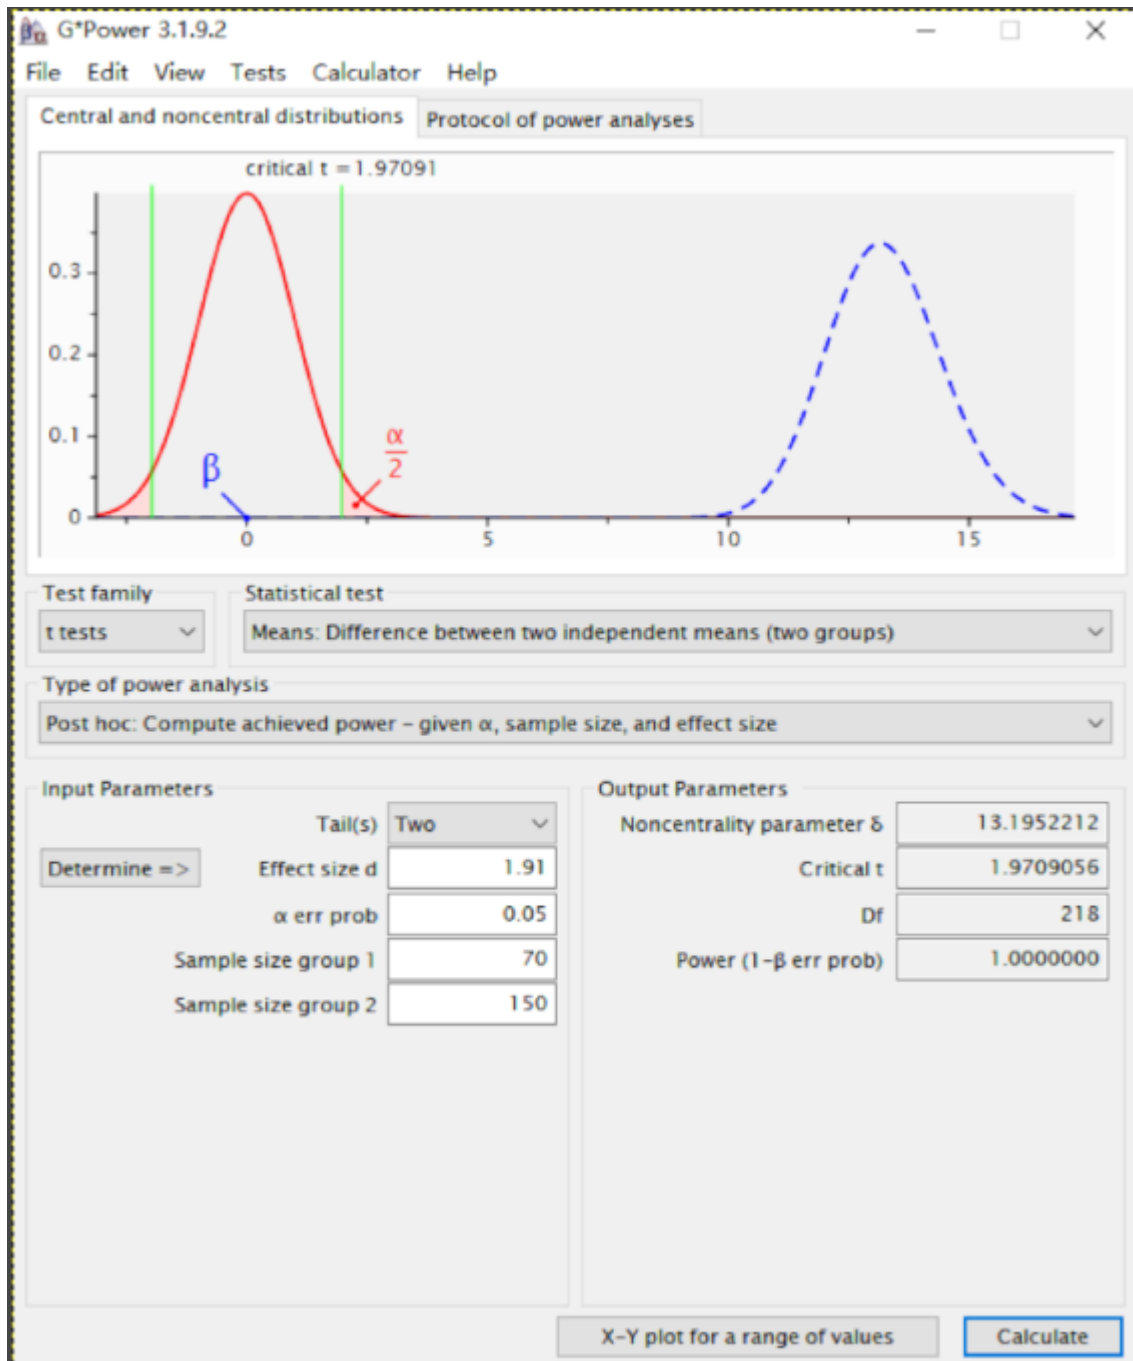

**Supplementary Figure 2** Gpower was used to calculate the statistical effect of lncRNA HEIH expression difference between the control group and NSCLC group.
